# Supplementary material for: Analysis of the lncRNA–miRNA–mRNA Network Reveals a Potential Regulatory Mechanism of EGFR-TKI Resistance in NSCLC
Source: PubMed Central journal article supplement (PMC9099042; doi:10.3389/fgene.2022.851391), 2022-04-29
Supplement: Table1.pdf [file Table1.pdf]

Table S1. Several EGFR-TKI resistant datasets

| Dataset   | GSE71587           |                 | GSE33658           |                 | GSE23206           |                 |
|-----------|--------------------|-----------------|--------------------|-----------------|--------------------|-----------------|
|           | EGFR-TKI sensitive | drug resistance | EGFR-TKI sensitive | drug resistance | EGFR-TKI sensitive | drug resistance |
| LINC01128 | 146.3681           | 136.3808        | 3.760905           | 3.44292         | 223.5167           | 138.8667        |
| PTEN      | 2065.664           | 2011.8965       | 7.021424           | 6.873691        | 4862.157           | 4525.836        |
